# Supplementary material
Source: PubMed Central journal article supplement (PMC5059842)
Supplement: NIHMS806900-supplement-308904R2_Acknowledgment_Permission.pdf [file NIHMS806900-supplement-308904R2_Acknowledgment_Permission.pdf]

## Circulation Research

---

**From:** Liu, Xiangdang - (liux) <liux@email.arizona.edu>  
**Sent:** Monday, July 25, 2016 5:51 PM  
**To:** circulation.research@circresearch.com  
**Cc:** Granzier, Hendrikus L - (granzier)  
**Subject:** CIRCRES/2016/308904R2 (Alternative Splicing of Titin Restores Diastolic Function in a HFpEF-like Genetic Murine Model (Ttn $\Delta$ IAjxn).)

To whom this may concern:

By this I give permission to be acknowledged in the manuscript titled "Alternative Splicing of Titin Restores Diastolic Function in a HFpEF-like Genetic Murine Model (Ttn $\Delta$ IAjxn)" by Bull et al.

CIRCRES/2016/308904R2

Mr. Xiangdang Liu
